# Supplementary material for: Niche adaptation and viral transmission of human papillomaviruses from archaic hominins to modern humans
Source: PLoS Pathog. 2018 Nov 1;14(11):e1007352. doi: 10.1371/journal.ppat.1007352 (PMC6211759; doi:10.1371/journal.ppat.1007352)
Supplement: S2 Table — (XLSX) [file ppat.1007352.s012.xlsx]

## Sheet: S2 Table
S2 Table. List of papillomavirus types used in this study.
PV type	NCBI accession	Nucleotide length	Taxonomy (Species)	Greek alphabet	Host	Selected type
HPV32	X74475	7961	Alphapapillomavirus 1	α1	Homo sapian	Yes
HPV117	GQ246950	7895	Alphapapillomavirus 2	α2	Homo sapian	Yes
HPV61	U31793	7989	Alphapapillomavirus 3	α3	Homo sapian	Yes
HPV2	X55964	7860	Alphapapillomavirus 4	α4	Homo sapian	Yes
HPV26	X74472	7855	Alphapapillomavirus 5	α5	Homo sapian	Yes
HPV30	X74474	7852	Alphapapillomavirus 6	α6	Homo sapian	Yes
HPV18	AY262282	7857	Alphapapillomavirus 7	α7	Homo sapian	Yes
HPV7	X74463	8027	Alphapapillomavirus 8	α8	Homo sapian	Yes
HPV16	NC_001526	7905	Alphapapillomavirus 9	α9	Homo sapian	Yes
HPV6	X00203	7902	Alphapapillomavirus 10	α10	Homo sapian	Yes
PpPV1	X62844	7902	Alphapapillomavirus 10	α10	Pan paniscus	No
HPV34	X74476	7723	Alphapapillomavirus 11	α11	Homo sapian	Yes
MmPV1	M60184	8028	Alphapapillomavirus 12	α12	Macacca mulatta	Yes
PhPV1	JF304764	8008	Alphapapillomavirus 12	α12	Papio hamadryas	No
HPV54	U37488	7759	Alphapapillomavirus 13	α13	Homo sapian	Yes
HPV71	AB040456	8017	Alphapapillomavirus 14	α14	Homo sapian	Yes
CgPV1	GU014532	8060	Alphapapillomavirus 14	α14	Colobus guereza	No
MmPV2	MG837557	7975	Alphapapillomavirus 15	-	Macacca mulatta	Yes
MmPV3	MG837558	8150	Alphapapillomavirus 16	-	Macacca mulatta	Yes
HPV5	M17463	7746	Betapapillomavirus 1	β1	Homo sapian	Yes
CgPV2	GU014533	7686	Betapapillomavirus 1	β1	Colobus guereza	No
MfPV1	EF028290	7588	Betapapillomavirus 1	β1	Macaca fascicularis	No
HPV9	X74464	7434	Betapapillomavirus 2	β2	Homo sapian	Yes
HPV49	X74480	7560	Betapapillomavirus 3	β3	Homo sapian	Yes
HPV92	AF531420	7461	Betapapillomavirus 4	β4	Homo sapian	Yes
HPV96	AY382779	7438	Betapapillomavirus 5	β5	Homo sapian	Yes
MfPV2	GU014531	7632	Betapapillomavirus 6	β6	Macaca fascicularis	Yes
HPV4	X70827	7353	Gammapapillomavirus 1	γ1	Homo sapian	Yes
HPV48	U31789	7100	Gammapapillomavirus 2	γ2	Homo sapian	Yes
HPV50	U31790	7184	Gammapapillomavirus 3	γ3	Homo sapian	Yes
HPV60	U31792	7313	Gammapapillomavirus 4	γ4	Homo sapian	Yes
HPV88	EF467176	7326	Gammapapillomavirus 5	γ5	Homo sapian	Yes
HPV101	DQ080081	7259	Gammapapillomavirus 6	γ6	Homo sapian	Yes
HPV109	EU541441	7346	Gammapapillomavirus 7	γ7	Homo sapian	Yes
HPV112	EU541442	7227	Gammapapillomavirus 8	γ8	Homo sapian	Yes
HPV116	FJ804072	7184	Gammapapillomavirus 9	γ9	Homo sapian	Yes
HPV121	GQ845443	7342	Gammapapillomavirus 10	γ10	Homo sapian	Yes
HPV126	AB646346	7326	Gammapapillomavirus 11	γ11	Homo sapian	Yes
HPV127	HM011570	7181	Gammapapillomavirus 12	γ12	Homo sapian	Yes
HPV128	GU225708	7259	Gammapapillomavirus 13	γ13	Homo sapian	Yes
HPV131	GU117631	7182	Gammapapillomavirus 14	γ14	Homo sapian	Yes
HPV135	HM999987	7293	Gammapapillomavirus 15	γ15	Homo sapian	Yes
HPV137	HM999989	7236	Gammapapillomavirus 16	γ16	Homo sapian	Yes
HPV144	HM999996	7271	Gammapapillomavirus 17	γ17	Homo sapian	Yes
HPV156	JX429973	7329	Gammapapillomavirus 18	γ18	Homo sapian	Yes
HPV161	JX413109	7238	Gammapapillomavirus 19	γ19	Homo sapian	Yes
HPV163	JX413107	7233	Gammapapillomavirus 20	γ20	Homo sapian	Yes
HPV167	KC862318	7228	Gammapapillomavirus 21	γ21	Homo sapian	Yes
HPV172	KF006399	7203	Gammapapillomavirus 22	γ22	Homo sapian	Yes
HPV175	KC108721	7226	Gammapapillomavirus 23	γ23	Homo sapian	Yes
HPV178	KJ130020	7314	Gammapapillomavirus 24	γ24	Homo sapian	Yes
HPV184	HG530535	7324	Gammapapillomavirus 25	γ25	Homo sapian	Yes
HPV187	KR816174	7268	Gammapapillomavirus 26	γ26	Homo sapian	Yes
HPV201	KP692115	7291	Gammapapillomavirus 27	γ27	Homo sapian	Yes
MmPV4	MG837559	7523	Gammapapillomavirus 30	-	Macacca mulatta	Yes
AaPV1	M15953	8095	Deltapapillomavirus 1	δ1	Alces Alces	Yes
OvPV1	M11910	8374	Deltapapillomavirus 2	δ2	Odocoileus virginianus	Yes
OaPV1	U83594	7761	Deltapapillomavirus 3	δ3	Ovis aries	Yes
BPV1	X02346	7945	Deltapapillomavirus 4	δ4	Bos taurus	Yes
CcaPV1	EF680235	8032	Deltapapillomavirus 5	δ5	Capreolus capreolus	Yes
CdPV1	HQ912790	7679	Deltapapillomavirus 6	δ6	Camelus dromedarius	Yes
GcPV1	KX954132	7688	Deltapapillomavirus 7	δ7	Giraffa camelopardalis	Yes
BPV5	AF457465	7841	Epsilonpapillomavirus 1	ε1	Bos taurus	Yes
CePV2	KU350625	8082	Epsilonpapillomavirus 2	ε2	Cervus elaphus	Yes
EcPV1	AF498323	7610	Zetapapillomavirus 1	ζ1	Equus ferus caballus	Yes
FcPV1	AY057109	7729	Etapapillomavirus 1	η1	Fringilla coelebs	Yes
PePV1	AF420235	7304	Thetapapillomavirus 1	θ1	Psittacus erithacus	Yes
MnPV1	U01834	7687	Iotapapillomavirus 1	ι1	Mastomys natalensis	Yes
PmPV1	JF755418	7704	Iotapapillomavirus 2	ι2	Peromyscus maniculatus	Yes
OcPV1	AF227240	7565	Kappapapillomavirus 1	κ1	Oryctolagus cuniculus	Yes
SfPV1	K02708	7868	Kappapapillomavirus 2	κ2	Sylvilagus floridanus	Yes
FcaPV1	AF480454	8300	Lambdapapillomavirus 1	λ1	Felis catus	Yes
CPV1	D55633	8607	Lambdapapillomavirus 2	λ2	Canis familiaris	Yes
CPV6	FJ492744	8242	Lambdapapillomavirus 3	λ3	Canis familiaris	Yes
PlPV1	AY763115	8170	Lambdapapillomavirus 4	λ4	Procyon lotor	Yes
CcrPV1	HQ585856	8344	Lambdapapillomavirus 5	λ5	Crocuta crocuta	Yes
HPV1	V01116	7815	Mupapillomavirus 1	μ1	Homo sapian	Yes
HPV63	X70828	7348	Mupapillomavirus 2	μ2	Homo sapian	Yes
HPV204	KP769769	7227	Mupapillomavirus 3	μ3	Homo sapian	Yes
HPV41	X56147	7614	Nupapillomavirus 1	ν1	Homo sapian	Yes
BPV3	AF486184	7276	Xipapillomavirus 1	ξ1	Bos taurus	Yes
BPV12	JF834523	7197	Xipapillomavirus 2	ξ2	Bos taurus	Yes
RtPV2	KC810012	7267	Xipapillomavirus 3	ξ3	Rangifer tarandus	Yes
BPV17	KU519392	7402	Xipapillomavirus 4	ξ4	Bos taurus	Yes
CePV3	KT932712	7409	Xipapillomavirus 5	ξ5	Cervus elaphus	Yes
PsPV1	AJ238373	7879	Omikronpapillomavirus 1	ο1	Phocoena spinipinnis	Yes
MaPV1	E15111	7647	Pipapillomavirus 1	π1	Mesocricetus auratus	Yes
McPV2	DQ664501	7522	Pipapillomavirus 2	π2	Mastomys coucha	Yes
TmPV1	AY609301	7722	Rhopapillomavirus 1	ρ1	Trichechus manatus latirostris	Yes
TmPV3	KP205502	7622	Rhopapillomavirus 2	ρ2	Trichechus manatus latirostris	Yes
EdPV1	AY684126	7428	Sigmapapillomavirus 1	σ1	Erethizon dorsatum	Yes
CPV2	AY722648	8101	Taupapillomavirus 1	τ1	Canis familiaris	Yes
CPV13	JX141478	8228	Taupapillomavirus 2	τ2	Canis familiaris	Yes
FcaPV3	JX972168	7583	Taupapillomavirus 3	τ3	Felis catus	Yes
MpPV1	KF006988	7985	Taupapillomavirus 4	τ4	Mustela putorius furo	Yes
TtPV1	EU240894	8089	Upsilonpapillomavirus 1	υ1	Tursiops truncatus	Yes
TtPV2	AY956402	7866	Upsilonpapillomavirus 2	υ2	Tursiops truncatus	Yes
PphPV2	GU117622	7635	Upsilonpapillomavirus 3	υ3	Phocoena phocoena	Yes
ChPV1	DQ091200	7542	Phipapillomavirus 1	φ1	Capra hircus	Yes
CPV3	DQ295066	7801	Chipapillomavirus 1	χ1	Canis familiaris	Yes
CPV4	EF584537	7742	Chipapillomavirus 2	χ2	Canis familiaris	Yes
CPV8	HQ262536	7784	Chipapillomavirus 3	χ3	Canis familiaris	Yes
RaPV1	DQ366842	7970	Psipapillomavirus 1	ψ1	Rousettus aegyptiacus	Yes
EhPV2	KX276957	7958	Psipapillomavirus 2	ψ2	Talpa europaea	Yes
EhPV3	KX276956	7991	Psipapillomavirus 3	ψ3	Talpa europaea	Yes
UmPV1	EF536349	7582	Omegapapillomavirus 1	ω1	Ursus maritimus	Yes
SsPV1	EF395818	7260	Dyodeltapapillomavirus 1	dyo-δ1	Sus scrofa	Yes
FlPV1	EU188799	7498	Dyoepsilonpapillomavirus 1	dyo-ε1	Francolinus leucoscepus	Yes
CcPV1	EU493092	7020	Dyozetapapillomavirus 1	dyo-ζ1	Caretta caretta	Yes
EePV1	FJ379293	8256	Dyoetapapillomavirus 1	dyo-η1	Erinaceus europaeus	Yes
FcaPV2	EU796884	7899	Dyothetapapillomavirus 1	dyo-θ1	Felis catus	Yes
EcPV2	EU503122	7802	Dyoiotapapillomavirus 1	dyo-ι1	Equus ferus caballus	Yes
EcPV4	JQ031032	7554	Dyoiotapapillomavirus 2	dyo-ι2	Equus ferus caballus	Yes
OaPV3	FJ796965	7344	Dyokappapapillomavirus 1	dyo-κ1	Ovis aries	Yes
RrPV1	KC876045	7256	Dyokappapapillomavirus 2	dyo-κ2	Rupicapra rupicapra	Yes
BPV16	KU519391	7527	Dyokappapapillomavirus 3	dyo-κ3	Bos taurus	Yes
BPV18	KU519393	7282	Dyokappapapillomavirus 4	dyo-κ4	Bos taurus	Yes
PpuPV1	KT932713	7138	Dyokappapapillomavirus 5	dyo-κ5	Pudu puda	Yes
BpPV1	GU220391	7737	Dyolambdapapillomavirus 1	dyo-λ1	Bettongia penicillata	Yes
MsPV1	HQ262535	7048	Dyomupapillomavirus 1	dyo-μ1	Morelia spilota	Yes
ZcPV1	HQ293213	7584	Dyonupapillomavirus 1	dyo-ν1	Zalophus californianus	Yes
BPV7	DQ217793	7412	Dyoxipapillomavirus 1	dyo-ξ1	Bos taurus	Yes
BPV19	KU519394	7253	Dyoxipapillomavirus 2	dyo-ξ2	Bos taurus	Yes
AgPV1	KP861980	7722	Dyoomikronpapillomavirus 1	dyo-ο1	Alouatta guariba clamitans	No
SscPV1	JF304765	7596	Dyoomikronpapillomavirus 1	dyo-ο1	Saimiri sciureus	Yes
SscPV2	JF304766	7657	Dyoomikronpapillomavirus 1	dyo-ο1	Saimiri sciureus	No
SscPV3	JF304767	7664	Dyoomikronpapillomavirus 1	dyo-ο1	Saimiri sciureus	No
PphPV4	GU117623	7348	Dyopipapillomavirus 1	dyo-π1	Phocoena phocoena	Yes
EcPV3	GU384895	7582	Dyorhopapillomavirus 1	dyo-ρ1	Equus ferus caballus	Yes
CcanPV1	KC020689	7435	Dyosigmapapillomavirus 1	dyo-σ1	Castor canadensis	Yes
MscPV2	JQ692938	7531	Dyotaupapillomavirus 1	dyo-τ1	Miniopterus schreibersii	Yes
EhPV1	JX123128	7891	Dyoupsilonpapillomavirus 1	dyo-υ1	Talpa europaea	Yes
TePV1	KC460986	7533	Dyophipapillomavirus 1	dyo-φ1	Talpa europaea	Yes
EaPV1	KF741371	7467	Dyochipapillomavirus 1	dyo-χ1	Equus asinus	Yes
EsPV1	KC858263	7668	Dyopsipapillomavirus 1	dyo-ψ1	Eptesicus serotinus	Yes
EsPV2	KC858264	7574	Dyoomegapapillomavirus 1	dyo-ω1	Eptesicus serotinus	Yes
RfPV1	KC858266	8249	Treisdeltapapillomavirus 1	treis-δ1	Rhinolophus ferrumequinum	Yes
PaPV1	KJ173785	7637	Treisepsilonpapillomavirus 1	treis-ε1	Pygoscelis adeliae	Yes
FgPV1	KJ452243	8132	Treiszetapapillomavirus 1	treis-ζ1	Fulmarus glacialis	Yes
VvPV1	KF857586	7519	Treisetapapillomavirus 1	treis-η1	Vulpes vulpes	Yes
RtiPV1	KP757765	7773	Treisthetapapillomavirus 1	treis-θ1	Rusa timorensis	Yes
MrPV1	JQ814847	7339	Treisiotapapillomavirus 1	treis-ι1	Myotis ricketti	Yes
EcPV8	KU963288	8155	Treiskappapapillomavirus 1	treis-κ1	Equus ferus caballus	Yes
HPV42	M73236	7917	Alphapapillomavirus 1	α1	Homo sapian	No
HPV10	X74465	7919	Alphapapillomavirus 2	α2	Homo sapian	No
HPV125	FN547152	7809	Alphapapillomavirus 2	α2	Homo sapian	No
HPV160	AB745694	7779	Alphapapillomavirus 2	α2	Homo sapian	No
HPV28	U31783	7959	Alphapapillomavirus 2	α2	Homo sapian	No
HPV29	U31784	7916	Alphapapillomavirus 2	α2	Homo sapian	No
HPV3	X74462	7820	Alphapapillomavirus 2	α2	Homo sapian	No
HPV77	Y15175	7887	Alphapapillomavirus 2	α2	Homo sapian	No
HPV78	KC138720 / 7830bp	7830	Alphapapillomavirus 2	α2	Homo sapian	No
HPV94	AJ620211	7881	Alphapapillomavirus 2	α2	Homo sapian	No
HPV102	DQ080083	8078	Alphapapillomavirus 3	α3	Homo sapian	No
HPV114	GQ244463	8069	Alphapapillomavirus 3	α3	Homo sapian	No
HPV62	AY395706	8092	Alphapapillomavirus 3	α3	Homo sapian	No
HPV72	X94164	7988	Alphapapillomavirus 3	α3	Homo sapian	No
HPV81	AJ620209	8070	Alphapapillomavirus 3	α3	Homo sapian	No
HPV83	AF151983	8104	Alphapapillomavirus 3	α3	Homo sapian	No
HPV84	AF293960	7948	Alphapapillomavirus 3	α3	Homo sapian	No
HPV86	AF349909	7983	Alphapapillomavirus 3	α3	Homo sapian	No
HPV87	AJ400628	7998	Alphapapillomavirus 3	α3	Homo sapian	No
HPV89	AF436128	8078	Alphapapillomavirus 3	α3	Homo sapian	No
HPV27	X74473	7823	Alphapapillomavirus 4	α4	Homo sapian	No
HPV57	X55965	7861	Alphapapillomavirus 4	α4	Homo sapian	No
HPV51	M62877	7808	Alphapapillomavirus 5	α5	Homo sapian	No
HPV69	AB027020	7700	Alphapapillomavirus 5	α5	Homo sapian	No
HPV82	AB027021	7871	Alphapapillomavirus 5	α5	Homo sapian	No
HPV53	X74482	7856	Alphapapillomavirus 6	α6	Homo sapian	No
HPV56	X74483	7844	Alphapapillomavirus 6	α6	Homo sapian	No
HPV66	U31794	7824	Alphapapillomavirus 6	α6	Homo sapian	No
HPV39	M62849	7833	Alphapapillomavirus 7	α7	Homo sapian	No
HPV45	X74479	7858	Alphapapillomavirus 7	α7	Homo sapian	No
HPV59	X77858	7896	Alphapapillomavirus 7	α7	Homo sapian	No
HPV68	DQ080079	7822	Alphapapillomavirus 7	α7	Homo sapian	No
HPV70	U21941	7905	Alphapapillomavirus 7	α7	Homo sapian	No
HPV85	AF131950	7812	Alphapapillomavirus 7	α7	Homo sapian	No
HPV97	DQ080080	7843	Alphapapillomavirus 7	α7	Homo sapian	No
HPV40	X74478	7909	Alphapapillomavirus 8	α8	Homo sapian	No
HPV43	AJ620205	7975	Alphapapillomavirus 8	α8	Homo sapian	No
HPV91	AF419318	7966	Alphapapillomavirus 8	α8	Homo sapian	No
HPV31	J04353	7912	Alphapapillomavirus 9	α9	Homo sapian	No
HPV33	M12732	7909	Alphapapillomavirus 9	α9	Homo sapian	No
HPV35	X74477	7879	Alphapapillomavirus 9	α9	Homo sapian	No
HPV52	X74481	7942	Alphapapillomavirus 9	α9	Homo sapian	No
HPV58	D90400	7824	Alphapapillomavirus 9	α9	Homo sapian	No
HPV67	D21208	7801	Alphapapillomavirus 9	α9	Homo sapian	No
HPV11	M14119	7931	Alphapapillomavirus 10	α10	Homo sapian	No
HPV13	X62843	7880	Alphapapillomavirus 10	α10	Homo sapian	No
HPV44	U31788	7833	Alphapapillomavirus 10	α10	Homo sapian	No
HPV74	AF436130	7887	Alphapapillomavirus 10	α10	Homo sapian	No
HPV177	KR816168	7933	Alphapapillomavirus 11	α11	Homo sapian	No
HPV73	X94165	7700	Alphapapillomavirus 11	α11	Homo sapian	No
MfPV10	EU490515	7920	Alphapapillomavirus 12	α12	Macaca fascicularis	No
MfPV11	GQ227670	8014	Alphapapillomavirus 12	α12	Macaca fascicularis	No
MfPV3	EF558839	7935	Alphapapillomavirus 12	α12	Macaca fascicularis	No
MfPV4	EF558841	7950	Alphapapillomavirus 12	α12	Macaca fascicularis	No
MfPV5	EF558843	7990	Alphapapillomavirus 12	α12	Macaca fascicularis	No
MfPV6	EF558840	7943	Alphapapillomavirus 12	α12	Macaca fascicularis	No
MfPV7	EF558838	8063	Alphapapillomavirus 12	α12	Macaca fascicularis	No
MfPV8	EF558842	8001	Alphapapillomavirus 12	α12	Macaca fascicularis	No
MfPV9	EU490516	7988	Alphapapillomavirus 12	α12	Macaca fascicularis	No
MfuPV1	KT944080	7898	Alphapapillomavirus 12	α12	Macaca fuscata	No
HPV106	DQ080082	8035	Alphapapillomavirus 14	α14	Homo sapian	No
HPV90	AY057438	8033	Alphapapillomavirus 14	α14	Homo sapian	No
HPV105	FM955841	7667	Betapapillomavirus 1	β1	Homo sapian	No
HPV118	GQ246951	7597	Betapapillomavirus 1	β1	Homo sapian	No
HPV12	X74466	7673	Betapapillomavirus 1	β1	Homo sapian	No
HPV124	GQ845446	7489	Betapapillomavirus 1	β1	Homo sapian	No
HPV14	X74467	7439	Betapapillomavirus 1	β1	Homo sapian	No
HPV143	HM999995	7715	Betapapillomavirus 1	β1	Homo sapian	No
HPV152	JF304768	7480	Betapapillomavirus 1	β1	Homo sapian	No
HPV19	X74470	7685	Betapapillomavirus 1	β1	Homo sapian	No
HPV195	KR816182	7569	Betapapillomavirus 1	β1	Homo sapian	No
HPV196	KR816183	7500	Betapapillomavirus 1	β1	Homo sapian	No
HPV20	U31778	7757	Betapapillomavirus 1	β1	Homo sapian	No
HPV21	U31779	7779	Betapapillomavirus 1	β1	Homo sapian	No
HPV24	U31782	7452	Betapapillomavirus 1	β1	Homo sapian	No
HPV25	X74471	7713	Betapapillomavirus 1	β1	Homo sapian	No
HPV36	U31785	7722	Betapapillomavirus 1	β1	Homo sapian	No
HPV47	M32305	7726	Betapapillomavirus 1	β1	Homo sapian	No
HPV8	M12737	7654	Betapapillomavirus 1	β1	Homo sapian	No
HPV93	AY382778	7450	Betapapillomavirus 1	β1	Homo sapian	No
HPV98	FM955837	7466	Betapapillomavirus 1	β1	Homo sapian	No
HPV99	FM955838	7698	Betapapillomavirus 1	β1	Homo sapian	No
HPV100	FM955839	7380	Betapapillomavirus 2	β2	Homo sapian	No
HPV104	FM955840	7386	Betapapillomavirus 2	β2	Homo sapian	No
HPV107	EF422221	7562	Betapapillomavirus 2	β2	Homo sapian	No
HPV110	EU410348	7423	Betapapillomavirus 2	β2	Homo sapian	No
HPV111	EU410349	7384	Betapapillomavirus 2	β2	Homo sapian	No
HPV113	FM955842	7412	Betapapillomavirus 2	β2	Homo sapian	No
HPV120	GQ845442	7304	Betapapillomavirus 2	β2	Homo sapian	No
HPV122	GQ845444	7397	Betapapillomavirus 2	β2	Homo sapian	No
HPV145	HM999997	7375	Betapapillomavirus 2	β2	Homo sapian	No
HPV15	X74468	7412	Betapapillomavirus 2	β2	Homo sapian	No
HPV151	FN677756	7386	Betapapillomavirus 2	β2	Homo sapian	No
HPV159	HE963025	7443	Betapapillomavirus 2	β2	Homo sapian	No
HPV17	X74469	7427	Betapapillomavirus 2	β2	Homo sapian	No
HPV174	HF930491	7359	Betapapillomavirus 2	β2	Homo sapian	No
HPV182	KR816170	7416	Betapapillomavirus 2	β2	Homo sapian	No
HPV22	U31780	7368	Betapapillomavirus 2	β2	Homo sapian	No
HPV23	U31781	7324	Betapapillomavirus 2	β2	Homo sapian	No
HPV37	U31786	7421	Betapapillomavirus 2	β2	Homo sapian	No
HPV38	U31787	7400	Betapapillomavirus 2	β2	Homo sapian	No
HPV80	Y15176	7427	Betapapillomavirus 2	β2	Homo sapian	No
HPV209	KY242583	7399	Betapapillomavirus 2	β2	Homo sapian	No
HPV115	FJ947080	7476	Betapapillomavirus 3	β3	Homo sapian	No
HPV75	Y15173	7537	Betapapillomavirus 3	β3	Homo sapian	No
HPV76	Y15174	7549	Betapapillomavirus 3	β3	Homo sapian	No
HPV150	FN677755	7436	Betapapillomavirus 5	β5	Homo sapian	No
HPV185	KR816172	7444	Betapapillomavirus 5	β5	Homo sapian	No
HPV158	KT698168	7192	Gammapapillomavirus 1	γ1	Homo sapian	No
HPV173	KF006400	7297	Gammapapillomavirus 1	γ1	Homo sapian	No
HPV205	KT698167	7298	Gammapapillomavirus 1	γ1	Homo sapian	No
HPV65	X70829	7308	Gammapapillomavirus 1	γ1	Homo sapian	No
HPV95	AJ620210	7337	Gammapapillomavirus 1	γ1	Homo sapian	No
HPV200	KP692114	7137	Gammapapillomavirus 2	γ2	Homo sapian	No
HPV188	KR816175	7185	Gammapapillomavirus 3	γ3	Homo sapian	No
HPV103	DQ080078	7263	Gammapapillomavirus 6	γ6	Homo sapian	No
HPV108	FM212639	7149	Gammapapillomavirus 6	γ6	Homo sapian	No
HPV123	GQ845445	7329	Gammapapillomavirus 7	γ7	Homo sapian	No
HPV134	GU117634	7309	Gammapapillomavirus 7	γ7	Homo sapian	No
HPV138	HM999990	7353	Gammapapillomavirus 7	γ7	Homo sapian	No
HPV139	HM999991	7360	Gammapapillomavirus 7	γ7	Homo sapian	No
HPV149	GU117629	7333	Gammapapillomavirus 7	γ7	Homo sapian	No
HPV155	JF906559	7352	Gammapapillomavirus 7	γ7	Homo sapian	No
HPV170	JX413110	7417	Gammapapillomavirus 7	γ7	Homo sapian	No
HPV186	KR816173	7389	Gammapapillomavirus 7	γ7	Homo sapian	No
HPV189	KR816176	7318	Gammapapillomavirus 7	γ7	Homo sapian	No
HPV193	KR816180	7348	Gammapapillomavirus 7	γ7	Homo sapian	No
HPV119	GQ845441	7251	Gammapapillomavirus 8	γ8	Homo sapian	No
HPV147	HM999999	7224	Gammapapillomavirus 8	γ8	Homo sapian	No
HPV164	JX413106	7233	Gammapapillomavirus 8	γ8	Homo sapian	No
HPV168	KC862317	7204	Gammapapillomavirus 8	γ8	Homo sapian	No
HPV176	KR816167	7226	Gammapapillomavirus 8	γ8	Homo sapian	No
HPV129	GU233853	7219	Gammapapillomavirus 9	γ9	Homo sapian	No
HPV130	GU117630	7388	Gammapapillomavirus 10	γ10	Homo sapian	No
HPV133	GU117633	7358	Gammapapillomavirus 10	γ10	Homo sapian	No
HPV142	HM999994	7374	Gammapapillomavirus 10	γ10	Homo sapian	No
HPV180	KC108722	7356	Gammapapillomavirus 10	γ10	Homo sapian	No
HPV191	KR816178	7364	Gammapapillomavirus 10	γ10	Homo sapian	No
HPV136	HM999988	7319	Gammapapillomavirus 11	γ11	Homo sapian	No
HPV140	HM999992	7341	Gammapapillomavirus 11	γ11	Homo sapian	No
HPV141	HM999993	7384	Gammapapillomavirus 11	γ11	Homo sapian	No
HPV154	JN211193	7286	Gammapapillomavirus 11	γ11	Homo sapian	No
HPV169	JX413105	7252	Gammapapillomavirus 11	γ11	Homo sapian	No
HPV171	KF006398	7261	Gammapapillomavirus 11	γ11	Homo sapian	No
HPV181	KR816169	7240	Gammapapillomavirus 11	γ11	Homo sapian	No
HPV202	KP692116	7344	Gammapapillomavirus 11	γ11	Homo sapian	No
HPV132	GU117632	7125	Gammapapillomavirus 12	γ12	Homo sapian	No
HPV148	GU129016	7164	Gammapapillomavirus 12	γ12	Homo sapian	No
HPV157	KT698166	7154	Gammapapillomavirus 12	γ12	Homo sapian	No
HPV165	JX444072	7129	Gammapapillomavirus 12	γ12	Homo sapian	No
HPV199	KJ913662	7184	Gammapapillomavirus 12	γ12	Homo sapian	No
HPV153	JN171845	7240	Gammapapillomavirus 13	γ13	Homo sapian	No
HPV146	HM999998	7265	Gammapapillomavirus 15	γ15	Homo sapian	No
HPV192	KR816179	7244	Gammapapillomavirus 15	γ15	Homo sapian	No
HPV179	HG421739	7228	Gammapapillomavirus 15	γ15	Homo sapian	No
HPV162	JX413108	7214	Gammapapillomavirus 19	γ19	Homo sapian	No
HPV166	JX413104	7212	Gammapapillomavirus 19	γ19	Homo sapian	No
HPV183	KR816171	7286	Gammapapillomavirus 20	γ20	Homo sapian	No
HPV194	KR816181	7260	Gammapapillomavirus 20	γ20	Homo sapian	No
HPV190	KR816177	7275	Gammapapillomavirus 24	γ24	Homo sapian	No
HPV197	KM085343	7278	Gammapapillomavirus 24	γ24	Homo sapian	No
Non-human primate papillomaviruses are highlighted in bold
