# Supplementary material for: Niche adaptation and viral transmission of human papillomaviruses from archaic hominins to modern humans
Source: PLoS Pathog. 2018 Nov 1;14(11):e1007352. doi: 10.1371/journal.ppat.1007352 (PMC6211759; doi:10.1371/journal.ppat.1007352)
Supplement: S3 Table — (XLSX) [file ppat.1007352.s013.xlsx]

## Sheet: S3 Table
S3 Table. List of 212 HPV16 complete genome variants.
Isolate ID	Lineage	previous lineage name	Length	NCBI accession	Study/Ethnic	References
HPV16Ref *	A1	European (Prototype)	7906bp	NC_001526	-	[86]
W12E	A1	European (Prototype)	7904bp	AF125673	-	[87]
114K	A1	European (Prototype)	7906bp	EU118173	-	[90]
CU1	A2	European (Prototype)	7906bp	FJ610146	Other/Thailand	[91]
CU2	A1	European (Prototype)	7906bp	FJ610147	Other/Thailand	[91]
CU3	A1	European (Prototype)	7906bp	FJ610148	Other/Thailand	[91]
CU4	A1	European (Prototype)	7906bp	FJ610149	Other/Thailand	[91]
CU5	A4	European (Asian)	7905bp	FJ610150	Other/Thailand	[91]
CU6	A1	European (Prototype)	7906bp	FJ610151	Other/Thailand	[91]
CU7	A2	European (Prototype)	7905bp	FJ610152	Other/Thailand	[91]
Amaz	B1	African-1 (Af-1)	7915bp	HM057182	Other/Brazil	NCBI/GenBank
PPH16	A1	European (Prototype)	7903bp	K02718	-	[92]
Qv00995 *	D3	Asian-American (AA2)	7906bp	AF402678	Costa Rica	[84]
Qv15321 *	D2	Asian-American (AA1)	7907bp	AY686579	Costa Rica	[84]
Qv15351	D2	Asian-American (AA1)	7907bp	AY686582	Costa Rica	[84]
Qv15521	A1	European (Prototype)	7906bp	AY686581	Costa Rica	[84]
Qv16936	A1	European (Prototype)	7906bp	AY686580	Costa Rica	[84]
Qv17722	A1	European (Prototype)	7906bp	AY686584	Costa Rica	[84]
Qv18158	A1	European (Prototype)	7907bp	AY686583	Costa Rica	[84]
R460 *	C1	African-2 (Af-2)	7904bp	AF472509	HAPI	[84]
R872	B1	African-1 (Af-1)	7908bp	AF472508	HAPI	[84]
w0122 *	A2	European (Prototype)	7904bp	AF536179	WIHS	[84]
w0236 *	B1	African-1 (Af-1)	7906bp	AF536180	WIHS	[84]
w0724 *	A4	European (Asian)	7905bp	AF534061	WIHS	[84]
BF039	C1	African-2 (Af-2)	7905bp	HQ644237	Burkina Faso	[83]
BF215	B1	African-1 (Af-1)	7908bp	HQ644238	Burkina Faso	[83]
BF236	C1	African-2 (Af-2)	7905bp	HQ644239	Burkina Faso	[83]
BF325	B1	African-1 (Af-1)	7908bp	HQ644240	Burkina Faso	[83]
Qv00079	D3	Asian-American (AA2)	7910bp	HQ644253	Costa Rica	[83]
Qv00124	D2	Asian-American (AA1)	7907bp	HQ644254	Costa Rica	[83]
Qv00346	D3	Asian-American (AA2)	7908bp	HQ644255	Costa Rica	[83]
Qv00370	A1	European (Prototype)	7906bp	HQ644256	Costa Rica	[83]
Qv00512 *	D1	North American-1 (NA1)	7886bp	HQ644257	Costa Rica	[83]
Qv00930	A1	European (Prototype)	7906bp	HQ644258	Costa Rica	[83]
Qv02234	A1	European (Prototype)	7907bp	HQ644259	Costa Rica	[83]
Qv02376	A1	European (Prototype)	7906bp	HQ644260	Costa Rica	[83]
Qv02706	A4	European (Asian)	7905bp	HQ644261	Costa Rica	[83]
Qv03470	A1	European (Prototype)	7906bp	HQ644262	Costa Rica	[83]
Qv03545	D2	Asian-American (AA1)	7906bp	HQ644263	Costa Rica	[83]
Qv03874	A1	European (Prototype)	7906bp	HQ644264	Costa Rica	[83]
Qv04917	D3	Asian-American (AA2)	7903bp	HQ644265	Costa Rica	[83]
Qv05460	A1	European (Prototype)	7906bp	HQ644266	Costa Rica	[83]
Qv11074	A1	European (Prototype)	7906bp	HQ644267	Costa Rica	[83]
Qv11687	A1	European (Prototype)	7904bp	HQ644268	Costa Rica	[83]
Qv13040	D3	Asian-American (AA2)	7908bp	HQ644269	Costa Rica	[83]
Qv13791	D2	Asian-American (AA1)	7909bp	HQ644270	Costa Rica	[83]
Qv13956	A1	European (Prototype)	7906bp	HQ644271	Costa Rica	[83]
Qv17286	A1	European (Prototype)	7902bp	HQ644272	Costa Rica	[83]
Qv19067	D2	Asian-American (AA1)	7906bp	HQ644273	Costa Rica	[83]
Qv19110	A1	European (Prototype)	7905bp	HQ644274	Costa Rica	[83]
Qv20322	A1	European (Prototype)	7905bp	HQ644275	Costa Rica	[83]
Qv21730	D3	Asian-American (AA2)	7906bp	HQ644276	Costa Rica	[83]
Qv22478	D2	Asian-American (AA1)	7908bp	HQ644277	Costa Rica	[83]
Qv23856	D3	Asian-American (AA2)	7907bp	HQ644278	Costa Rica	[83]
Qv23890	D2	Asian-American (AA1)	7906bp	HQ644279	Costa Rica	[83]
Qv24723	A1	European (Prototype)	7905bp	HQ644280	Costa Rica	[83]
Qv24898	D2	Asian-American (AA1)	7905bp	HQ644281	Costa Rica	[83]
Qv25054	A1	European (Prototype)	7903bp	HQ644282	Costa Rica	[83]
Qv25086	A1	European (Prototype)	7903bp	HQ644283	Costa Rica	[83]
Qv28131	A1	European (Prototype)	7905bp	HQ644284	Costa Rica	[83]
Qv33364	D3	Asian-American (AA2)	7906bp	HQ644285	Costa Rica	[83]
Qv33501	A1	European (Prototype)	7903bp	HQ644286	Costa Rica	[83]
Qv35943	A1	European (Prototype)	7901bp	HQ644287	Costa Rica	[83]
IARC050094	D2	Asian-American (AA1)	7908bp	HQ644241	IARC/Cuba	[83]
IARC240211 *	C2	African-2 (Af-2)	7904bp	HQ644244	IARC/Guinea	[83]
IARC207412R	C3	African-2 (Af-2)	7904bp	HQ644243	IARC/Mali	[83]
IARC312312	A3	European (Prototype)	7905bp	HQ644245	IARC/Morocco	[83]
IARC160232	D2	Asian-American (AA1)	7909bp	HQ644242	IARC/Paraguay	[83]
IARC630712	A3	European (Prototype)	7905bp	HQ644246	IARC/Thailand	[83]
NG609	C1	African-2 (Af-2)	7904bp	HQ644252	Nigeria	[83]
Rw649	D3	Asian-American (AA2)	7906bp	HQ644288	Rwanda	[83]
Rw677	D3	Asian-American (AA2)	7906bp	HQ644289	Rwanda	[83]
Rw768	B1	African-1 (Af-1)	7908bp	HQ644290	Rwanda	[83]
Rw851	C1	African-2 (Af-2)	7904bp	HQ644291	Rwanda	[83]
Rw862	C1	African-2 (Af-2)	7904bp	HQ644292	Rwanda	[83]
Rw918	B1	African-1 (Af-1)	7908bp	HQ644293	Rwanda	[83]
AS097	A4	European (Asian)	7905bp	HQ644234	Taiwan	[83]
AS310	A4	European (Asian)	7905bp	HQ644235	Taiwan	[83]
AS411 *	A3	European (Prototype)	7905bp	HQ644236	Taiwan	[83]
IN000078	D3	Asian-American (AA2)	7906bp	HQ644247	Thailand	[83]
IN151168	A4	European (Asian)	7904bp	HQ644248	Thailand	[83]
IN221688	C1	African-2 (Af-2)	7905bp	HQ644249	Thailand	[83]
IN272098	C1	African-2 (Af-2)	7904bp	HQ644250	Thailand	[83]
INJP0168	A4	European (Asian)	7904bp	HQ644251	Thailand	[83]
UPB2	D3	Asian-American (AA2)	7904bp	HQ644294	Uganda	[83]
UPB20	D3	Asian-American (AA2)	7904bp	HQ644295	Uganda	[83]
Z016	B1	African-1 (Af-1)	7905bp	HQ644296	Zambia	[83]
Z032	A1	European (Prototype)	7905bp	HQ644297	Zambia	[83]
Z109 *	B2	African-1 (Af-1)	7909bp	HQ644298	Zambia	[83]
Z122	B1	African-1 (Af-1)	7905bp	HQ644299	Zambia	[83]
CVT11	D1	North American-1 (NA1)	7886bp	KU053929	CVT	this work
IARC903812	D4	North American-2 (NA2)	7909bp	KU053931	IARC/Algeria	this work
IARC907912 *	B4	African-1 (Af-1)	7907bp	KU053914	IARC/Algeria	this work
IARC908612	B4	African-1 (Af-1)	7907bp	KU053913	IARC/Algeria	this work
IARC900912 *	D4	North American-2 (NA2)	7908bp	KU053933	IARC/Algeria	this work
IARC904612	A1	European (Prototype)	7905bp	KU053853	IARC/Algeria	this work
IARC916812	D1	North American-1 (NA1)	7884bp	KU053926	IARC/Algeria	this work
IARC010512	A1	European (Prototype)	7906bp	KU053855	IARC/Argentina	this work
IARC040105	C3	African-2 (Af-2)	7904bp	KU053920	IARC/Benin	this work
IARC020237	D2	Asian-American (AA1)	7907bp	KU053936	IARC/Brazil	this work
IARC805712	D1	North American-1 (NA1)	7886bp	KU053927	IARC/India	this work
IARC202412 *	B3	African-1 (Af-1)	7907bp	KU053910	IARC/Mali	this work
IARC204112	B3	African-1 (Af-1)	7907bp	KU053909	IARC/Mali	this work
IARC207412 *	C3	African-2 (Af-2)	7754bp	KU053921	IARC/Mali	this work
IARC301512	D4	North American-2 (NA2)	7909bp	KU053934	IARC/Morocco	this work
IARC303912	B4	African-1 (Af-1)	7905bp	KU053911	IARC/Morocco	this work
IARC304612	C4	African-2 (Af-2)	7904bp	KU053925	IARC/Morocco	this work
IARC307712	B4	African-1 (Af-1)	7907bp	KU053912	IARC/Morocco	this work
IARC313712 *	C4	African-2 (Af-2)	7900bp	KU053922	IARC/Morocco	this work
IARC313812	C4	African-2 (Af-2)	7900bp	KU053923	IARC/Morocco	this work
IARC313912	C4	African-2 (Af-2)	7900bp	KU053924	IARC/Morocco	this work
IARC311502	D4	North American-2 (NA2)	7909bp	KU053932	IARC/Morocco	this work
IARC1100085	B2	African-1 (Af-1)	7912bp	KU053915	IARC/Nigeria	this work
PAP0097	A1	European (Prototype)	7906bp	KU053833	PAP	this work
PAP0103	A1	European (Prototype)	7906bp	KU053835	PAP	this work
PAP0114	C1	African-2 (Af-2)	7904bp	KU053917	PAP	this work
PAP0160	A1	European (Prototype)	7906bp	KU053850	PAP	this work
PAP0164	A1	European (Prototype)	7906bp	KU053866	PAP	this work
PAP0201	A4	European (Asian)	7817bp	KU053904	PAP	this work
PAP0206	A1	European (Prototype)	7906bp	KU053856	PAP	this work
PAP0207	A1	European (Prototype)	7905bp	KU053859	PAP	this work
PAP0286	D3	Asian-American (AA2)	7906bp	KU053938	PAP	this work
PAP0290	C1	African-2 (Af-2)	7904bp	KU053916	PAP	this work
PAP0295	A1	European (Prototype)	7906bp	KU053840	PAP	this work
PAP0321	A1	European (Prototype)	7907bp	KU053825	PAP	this work
PAP0326	C1	African-2 (Af-2)	7904bp	KU053919	PAP	this work
PAP0343	B1	African-1 (Af-1)	7906bp	KU053906	PAP	this work
PAP0370	A1	European (Prototype)	7905bp	KU053891	PAP	this work
PAP0409	A1	European (Prototype)	7909bp	KU053872	PAP	this work
PAP0421	A2	European (Prototype)	7905bp	KU053897	PAP	this work
PAP0451	A1	European (Prototype)	7906bp	KU053864	PAP	this work
PAP0458	A1	European (Prototype)	7906bp	KU053841	PAP	this work
PAP0471	A2	European (Prototype)	7906bp	KU053898	PAP	this work
PAP0503	A1	European (Prototype)	7906bp	KU053829	PAP	this work
PAP0516	A1	European (Prototype)	7906bp	KU053862	PAP	this work
PAP0534	A2	European (Prototype)	7902bp	KU053899	PAP	this work
PAP0555	A1	European (Prototype)	7911bp	KU053888	PAP	this work
PAP0574	A1	European (Prototype)	7906bp	KU053861	PAP	this work
PAP0594	A1	European (Prototype)	7913bp	KU053854	PAP	this work
PAP0604	A1	European (Prototype)	7906bp	KU053858	PAP	this work
PAP0677	A1	European (Prototype)	7906bp	KU053857	PAP	this work
PAP0689	A1	European (Prototype)	7908bp	KU053869	PAP	this work
PAP0694	A1	European (Prototype)	7906bp	KU053887	PAP	this work
PAP0708	A1	European (Prototype)	7906bp	KU053843	PAP	this work
PAP0710	A1	European (Prototype)	7906bp	KU053847	PAP	this work
PAP0711	A1	European (Prototype)	7906bp	KU053838	PAP	this work
PAP0728	A1	European (Prototype)	7906bp	KU053845	PAP	this work
PAP0745	D2	Asian-American (AA1)	7906bp	KU053935	PAP	this work
PAP0753	A1	European (Prototype)	7906bp	KU053876	PAP	this work
PAP0769	A1	European (Prototype)	7906bp	KU053846	PAP	this work
PAP0778	A1	European (Prototype)	7906bp	KU053830	PAP	this work
PAP0782	B1	African-1 (Af-1)	7906bp	KU053907	PAP	this work
PAP0819	A1	European (Prototype)	7906bp	KU053863	PAP	this work
PAP0829	A1	European (Prototype)	7905bp	KU053849	PAP	this work
PAP0873	A1	European (Prototype)	7906bp	KU053883	PAP	this work
PAP0931	A1	European (Prototype)	7905bp	KU053823	PAP	this work
PAP0946	A1	European (Prototype)	7907bp	KU053827	PAP	this work
PAP0966	D3	Asian-American (AA2)	7901bp	KU053940	PAP	this work
PAP0978	A1	European (Prototype)	7906bp	KU053867	PAP	this work
PAP0989	A1	European (Prototype)	7906bp	KU053837	PAP	this work
PAP1009	A2	European (Prototype)	7905bp	KU053894	PAP	this work
PAP1010	A1	European (Prototype)	7906bp	KU053842	PAP	this work
PAP1015	A1	European (Prototype)	7906bp	KU053882	PAP	this work
PAP1048	A1	European (Prototype)	7906bp	KU053878	PAP	this work
PAP1067	A1	European (Prototype)	7906bp	KU053831	PAP	this work
PAP1141	A1	European (Prototype)	7906bp	KU053889	PAP	this work
PAP1156	A1	European (Prototype)	7906bp	KU053836	PAP	this work
PAP1181	A1	European (Prototype)	7973bp	KU053871	PAP	this work
PAP1231	A1	European (Prototype)	7906bp	KU053839	PAP	this work
PAP1261	A1	European (Prototype)	7906bp	KU053890	PAP	this work
PAP1263	A4	European (Asian)	7920bp	KU053905	PAP	this work
PAP1273	A2	European (Prototype)	7905bp	KU053900	PAP	this work
PAP1274	D3	Asian-American (AA2)	7906bp	KU053941	PAP	this work
PAP1289	A1	European (Prototype)	7906bp	KU053860	PAP	this work
PAP1334	A1	European (Prototype)	7906bp	KU053868	PAP	this work
PAP1359	D3	Asian-American (AA2)	7907bp	KU053937	PAP	this work
PAP1376	A1	European (Prototype)	7973bp	KU053873	PAP	this work
PAP1391	A1	European (Prototype)	7972bp	KU053874	PAP	this work
PAP1426	A1	European (Prototype)	7906bp	KU053880	PAP	this work
PAP1441	A1	European (Prototype)	7905bp	KU053886	PAP	this work
PAP1450	A2	European (Prototype)	7905bp	KU053903	PAP	this work
PAP1466	A1	European (Prototype)	7971bp	KU053870	PAP	this work
PAP1494	A2	European (Prototype)	7905bp	KU053892	PAP	this work
PAP1501	A1	European (Prototype)	7910bp	KU053875	PAP	this work
PAP1533	A2	European (Prototype)	7905bp	KU053902	PAP	this work
PAP1543	D3	Asian-American (AA2)	7908bp	KU053939	PAP	this work
PAP1583	A1	European (Prototype)	7906bp	KU053879	PAP	this work
PAP1591	A1	European (Prototype)	7906bp	KU053885	PAP	this work
PAP1618	A2	European (Prototype)	7905bp	KU053893	PAP	this work
PAP1621	D3	Asian-American (AA2)	7906bp	KU053944	PAP	this work
PAP1659	A2	European (Prototype)	7905bp	KU053901	PAP	this work
PAP1700	A1	European (Prototype)	7906bp	KU053844	PAP	this work
PAP1706	A1	European (Prototype)	7906bp	KU053865	PAP	this work
PAP1730	A1	European (Prototype)	7907bp	KU053877	PAP	this work
PAP1735	B1	African-1 (Af-1)	7908bp	KU053908	PAP	this work
PAP1754	A1	European (Prototype)	7906bp	KU053824	PAP	this work
PAP1763	A2	European (Prototype)	7893bp	KU053895	PAP	this work
PAP1779	A1	European (Prototype)	7906bp	KU053834	PAP	this work
PAP1783	D1	North American-1 (NA1)	7886bp	KU053928	PAP	this work
PAP1791	A1	European (Prototype)	7907bp	KU053828	PAP	this work
PAP1864	A1	European (Prototype)	7906bp	KU053848	PAP	this work
PAP1878	D3	Asian-American (AA2)	7907bp	KU053942	PAP	this work
PAP1879	A1	European (Prototype)	7906bp	KU053826	PAP	this work
PAP1885	A2	European (Prototype)	7905bp	KU053896	PAP	this work
PAP1899	A1	European (Prototype)	7906bp	KU053832	PAP	this work
PAP1924	A1	European (Prototype)	7906bp	KU053884	PAP	this work
PAP1988	D3	Asian-American (AA2)	7908bp	KU053943	PAP	this work
PAP1993	A1	European (Prototype)	7906bp	KU053851	PAP	this work
PAP2035	A1	European (Prototype)	7907bp	KU053881	PAP	this work
Plasmid114B	A1	European (Prototype)	7906bp	KU053852	-	this work
Plasmid2716	C1	African-2 (Af-2)	7904bp	KU053918	-	this work
Plasmid3724	D1	North American-1 (NA1)	7886bp	KU053930	-	this work
1) Sequences from the authors' group are highlighted in bold.
2) * indicates the reference sequence of each sublineage.
